# Supplementary material
Source: ML conference proceedings conference paper supplement (https://openreview.net/forum?id=I7meDPJFy8)
Supplement: supplementary_material [file Towing_Supplementary.pdf › Towing_Supplement/Towing_Supplementary.pdf]

---

## Chat Conversation Links

---

**Anonymous Author(s)**

Affiliation

Address

email

1 This document provides links to the chat conversations used in the writing of our paper. All links  
2 are accessible as of the submission date.

3 The code for the difference-in-differences and triple-difference analyses are also shared in a separate  
4 code file, titled "Regression\_Code.ipynb".

### 5 **Chat Links**

6 Chat 1: [Google Gemini Conversation](#)

7 Chat 2: [ChatGPT Conversation](#)
